# Supplementary material for: What families really think about the quality of early intervention centers: a perspective from mixed methods
Source: PeerJ. 2020 Oct 20;8:e10193. doi: 10.7717/peerj.10193 (PMC7583605; doi:10.7717/peerj.10193)
Supplement: Supplemental Information 2 [file peerj-08-10193-s002.xlsx]

## Sheet: Labels
Column	Label	Description
A	Code_Identification	Participant identification code
B	Gender	0=Male, 1=Female, 2=Missing
C	Range of age	1=<20 years, 2=21-30 years, 3=31-40 years, 4=41-50 years, 5=51-60 years, 6=>61, 7=missing
D	Family relationship	1=Mother, 2=Father, 3=Aunt, 4=Uncle, 5=Grandmother, 6=Grandfather, 7=Caregiver, 8=Others, 9=Missing
E	Academic studies	1=Elemental, 2=Primary, 3=Secondary, 4=University, 5=Masters, 6=Professional studies, 7=Missing
F	Stay in treatment	1=6-12 months, 2=13-24 months, 3=25-36 months, 4=37-48 months, 5=49-60 months, 6=61-72 months, 7=Missing
G	IQEIC-1	Response to the Item 1 of the Inventory of Quality in Early Intervention Centers
H	IQEIC-2	Response to the Item 2 of the Inventory of Quality in Early Intervention Centers
I	IQEIC-3	Response to the Item 3 of the Inventory of Quality in Early Intervention Centers
J	IQEIC-4	Response to the Item 4 of the Inventory of Quality in Early Intervention Centers
K	IQEIC-5	Response to the Item 5 of the Inventory of Quality in Early Intervention Centers
L	IQEIC-6	Response to the Item 6 of the Inventory of Quality in Early Intervention Centers
M	IQEIC-7	Response to the Item 7 of the Inventory of Quality in Early Intervention Centers
N	IQEIC-8	Response to the Item 8 of the Inventory of Quality in Early Intervention Centers
O	IQEIC-9	Response to the Item 9 of the Inventory of Quality in Early Intervention Centers
P	IQEIC-10	Response to the Item 10 of the Inventory of Quality in Early Intervention Centers
Q	IQEIC-11	Response to the Item 11 of the Inventory of Quality in Early Intervention Centers
R	IQEIC-12	Response to the Item 12 of the Inventory of Quality in Early Intervention Centers
S	IQEIC-13	Response to the Item 13 of the Inventory of Quality in Early Intervention Centers
T	IQEIC-14	Response to the Item 14 of the Inventory of Quality in Early Intervention Centers
U	IQEIC-15	Response to the Item 15 of the Inventory of Quality in Early Intervention Centers
V	IQEIC-16	Response to the Item 16 of the Inventory of Quality in Early Intervention Centers
W	IQEIC-17	Response to the Item 17 of the Inventory of Quality in Early Intervention Centers
X	IQEIC-18	Response to the Item 18 of the Inventory of Quality in Early Intervention Centers
Y	IQEIC-19	Response to the Item 19 of the Inventory of Quality in Early Intervention Centers
Z	IQEIC-20	Response to the Item 20 of the Inventory of Quality in Early Intervention Centers
AA	IQEIC-21	Response to the Item 21 of the Inventory of Quality in Early Intervention Centers
AB	IQEIC-22	Response to the Item 22 of the Inventory of Quality in Early Intervention Centers
AC	IQEIC-23	Response to the Item 23 of the Inventory of Quality in Early Intervention Centers
AD	IQEIC-24	Response to the Item 24 of the Inventory of Quality in Early Intervention Centers
AE	IQEIC-25	Response to the Item 25 of the Inventory of Quality in Early Intervention Centers
AF	IQEIC-26	Response to the Item 26 of the Inventory of Quality in Early Intervention Centers
AG	IQEIC-27	Response to the Item 27 of the Inventory of Quality in Early Intervention Centers
AH	IQEIC-28	Response to the Item 28 of the Inventory of Quality in Early Intervention Centers
AI	IQEIC-29	Response to the Item 29 of the Inventory of Quality in Early Intervention Centers
AJ	IQEIC-30	Response to the Item 30 of the Inventory of Quality in Early Intervention Centers
AK	IQEIC-31	Response to the Item 31 of the Inventory of Quality in Early Intervention Centers
AL	IQEIC-32	Response to the Item 32 of the Inventory of Quality in Early Intervention Centers
AM	IQEIC-33	Response to the Item 33 of the Inventory of Quality in Early Intervention Centers
AN	IQEIC-34	Response to the Item 34 of the Inventory of Quality in Early Intervention Centers
AO	IQEIC-35	Response to the Item 35 of the Inventory of Quality in Early Intervention Centers
AP	IQEIC-36	Response to the Item 36 of the Inventory of Quality in Early Intervention Centers
AQ	IQEIC-37	Response to the Item 37 of the Inventory of Quality in Early Intervention Centers
AR	IQEIC-43	Response to the Item 43 of the Inventory of Quality in Early Intervention Centers
AS	IQEIC-44	Response to the Item 44 of the Inventory of Quality in Early Intervention Centers
AT	IQEIC-45	Response to the Item 45 of the Inventory of Quality in Early Intervention Centers
AU	IQEIC-46	Response to the Item 46 of the Inventory of Quality in Early Intervention Centers
AV	IQEIC-47	Response to the Item 47 of the Inventory of Quality in Early Intervention Centers
AW	IQEIC-48	Response to the Item 48 of the Inventory of Quality in Early Intervention Centers
AX	S-49	Response to the Item 1 of the Satisfaction Scale
AY	S-50	Response to the Item 2 of the Satisfaction Scale
AZ	S-51	Response to the Item 3 of the Satisfaction Scale
BA	FI-52	Response to the Item 1 of the Future Intencion Scale
BB	FI-53	Response to the Item 2 of the Future Intencion Scale
BC	FI-54	Response to the Item 3 of the Future Intencion Scale
BD	FI-55	Response to the Item 4 of the Future Intencion Scale

## Sheet: Study information
Code_Identification	Gender	Range of age	Family relationship	Academic studies	Stay	IQEIC-1	IQEIC-2	IQEIC-3	IQEIC-4	IQEIC-5	IQEIC-6	IQUEIC-7	IQEIC-8	IQEIC-9	IQEIC-10	IQEIC-11	IQEIC-12	IQEIC-13	IQEIC-14	IQEIC-15	IQEIC-16	IQEIC-17	IQEIC-18	IQEIC-19	IQEIC-20	IQEIC-21	IQEIC-22	IQEIC-23	IQEIC-24	IQEIC-25	IQEIC-26	IQEIC-27	IQEIC-28	IQEIC-29	IQEIC-30	IQEIC-31	IQEIC-32	IQEIC-33	IQEIC-43	IQEIC-35	IQEIC-36	IQEIC-37	IQEIC-43	IQEIC-44	IQEIC-45	IQEIC-46	IQEIC-47	IQEIC-48	S49
1	1	2	1	3	3	5	3.54	5	4	4	4	1	1	5	4	4	3	1	3	4	4	4	4	5	5	5	4	4	4	3	3	3	4	4	4	4	4	4	5	4	4	4	4	4	4	4	4	4	5
2	1	3	1	2	1	4	4.77	3	5	5	5	5	5	5	5	5	5	5	5	5	5	5	5	5	5	5	5	5	5	1	2	5	5	5	5	5	5	5	5	5	5	5	5	5	5	5	5	5	3
3	0	2	2	3	1	5	4.31	4	1	5	5	5	5	5	5	5	4	2	4	5	5	5	4	5	4	5	3	5	4	3	5	5	3	5	5	5	5	5	5	5	5	5	5	5	5	5	5	5	5
4	1	2	1	1	2	4	4.31	3	5	5	5	5	5	5	5	5	5	1	5	5	5	5	5	5	5	5	5	5	1	4	1	5	5	5	4	5	5	5	5	5	5	5	4	2	5	5	5	5	5
5	1	2	1	2	1	5	5	5	5	5	5	5	5	5	5	5	5	5	5	5	5	5	5	5	5	5	5	5	5	5	5	5	5	5	5	5	5	5	5	5	5	5	5	5	5	5	5	5	5
6	0	3	2	3	1	5	4.54	3	5	5	5	5	5	5	5	3	4	4	4	4	4	5	5	5	5	5	5	5	3	3	5	5	5	4	5	5	5	5	5	5	5	5	5	5	5	5	5	5	5
7	0	2	2	2	1	2	3.85	4	5	5	4	4	4	5	5	3	1	4	5	4	4	4	4	4	3	5	5	4	3	5	4	5	3	5	5	5	5	5	5	5	4	5	5	5	5	1	1	5	4
8	0	3	2	2	1	5	4.38	4	5	5	5	5	4	4	5	4	3	3	4	3	4	4	5	4	4	4	5	5	4	4	5	5	4	4	5	4	5	5	5	4	5	4	5	5	5	5	5	5	5
9	1	3	1	4	1	1	3.15	1	5	5	3	2	5	3	4	4	1	5	4	5	5	4	5	5	5	5	4	5	1	4	2	5	3	4	5	5	5	5	5	5	4	5	5	4	5	5	5	5	5
10	1	4	1	2	1	4	4	4	4	4	4	4	4	4	4	4	4	4	4	4	4	4	4	4	4	4	4	5	3	2	3	4	4	4	4	4	4	4	4	4	4	4	4	4	4	4	4	5	5
11	1	2	1	4	2	5	5	5	5	5	5	5	5	5	5	5	5	5	5	5	5	5	5	5	5	5	5	5	5	5	3	5	5	5	5	5	5	5	5	5	5	5	5	5	5	5	5	5	5
12	0	1	8	3	1	3	3.92	3	4	5	5	4	4	5	5	3	3	5	4	4	3	3	4	4	4	3	4	3	3	1	3	4	3	3	5	5	4	4	4	4	4	4	5	5	4	4	4	5	5
13	0	2	2	2	1	3	4.77	5	4	5	5	5	5	5	5	5	5	5	5	5	5	5	5	5	5	5	5	5	5	5	5	5	5	5	5	5	5	5	5	3	5	5	5	5	5	5	5	5	5
14	0	4	2	4	2	4	3.46	2	2	4	4	4	3	3	4	4	4	3	3	3	3	3	4	4	3	3	4	4	4	2	3	5	3	4	4	5	4	5	5	4	4	5	4	4	4	3	3	3	5
15	1	4	1	4	2	3	3.92	3	5	4	5	5	3	4	4	4	4	4	4	5	4	4	4	4	4	4	3	5	4	4	4	5	4	5	5	5	5	5	5	5	5	5	5	5	5	5	5	5	5
16	0	3	2	3	1	2	2.62	1	1	4	3	4	4	3	3	3	2	1	3	3	3	3	3	2	4	3	4	3	1	1	1	3	3	4	5	5	5	5	5	5	5	5	3	3	4	2	2	2	5
17	0	3	2	4	2	1	2.85	2	4	3	2	3	4	3	3	4	2	3	3	4	5	4	3	4	4	5	5	3	4	3	3	4	3	3	4	3	4	4	3	4	4	4	4	4	4	4	5	4	4
18	1	3	1	3	2	5	3.92	3	5	5	3	4	2	3	5	5	3	3	3	3	3	3	3	3	3	4	4	5	3	5	5	5	5	5	5	5	5	5	5	5	5	5	5	5	5	5	5	5	5
19	1	2	1	2	1	5	4.15	3	5	5	5	5	4	5	5	4	2	3	4	4	4	4	5	4	5	5	5	3	3	5	5	5	4	5	5	5	5	5	5	5	5	5	5	5	5	5	5	5	5
20	1	2	1	3	2	5	4.62	3	5	5	5	5	5	5	5	4	5	4	5	5	5	5	5	5	5	5	5	5	5	5	5	5	5	5	5	5	5	5	5	5	5	5	5	5	5	5	5	5	5
21	0	3	2	4	2	5	4.46	5	5	5	5	5	5	5	5	5	4	2	5	5	5	5	5	5	5	5	5	5	4	5	5	5	4	5	5	5	5	5	5	5	3	5	5	3	5	4	5	5	2
22	0	3	2	2	2	4	3.31	1	1	5	5	3	4	3	5	5	4	1	5	5	4	5	5	4	4	5	5	4	4	5	5	4	5	5	5	5	3	5	5	5	5	5	5	5	5	4	2	5	3
23	0	4	2	4	1	4	3.77	4	4	4	4	4	4	4	4	3	4	3	4	4	4	4	5	5	5	5	5	5	5	5	4	5	5	5	5	5	5	5	5	5	4	5	5	5	5	5	5	5	5
24	1	2	1	2	1	5	3.46	1	1	4	5	4	4	5	5	4	5	1	3	3	3	3	4	4	4	5	2	3	4	4	3	2	1	5	5	4	4	5	2	4	4	3	4	4	4	3	1	2	5
25	1	3	1	4	1	2	3.38	3	5	4	4	4	4	4	5	5	2	1	1	1	4	4	3	3	4	5	5	4	1	3	1	5	4	4	5	5	5	5	5	5	4	5	5	5	5	5	5	5	5
26	1	4	1	1	1	5	4.15	3	3	5	5	5	4	5	5	5	5	1	5	5	3	4	5	5	5	5	5	5	5	2	3	5	4	5	5	5	5	5	5	5	5	5	5	4	3	1	4	5	5
27	1	3	1	2	3	5	4.54	3	5	5	5	5	5	5	5	5	5	1	3	1	4	4	5	5	5	5	5	5	5	5	5	4	4	4	4	4	4	5	5	4	5	5	5	3	3	3	5	5	5
28	1	3	1	3	1	3	2.77	1	2	3	3	3	3	5	5	3	3	1	3	4	4	3	4	3	3	4	4	4	4	5	5	5	5	4	5	5	5	5	5	5	4	5	4	5	5	5	5	5	5
29	0	3	2	4	5	5	3.54	2	4	4	4	4	2	4	4	4	3	4	4	4	4	4	4	4	3	4	4	4	2	3	2	5	4	4	4	3	4	3	5	4	4	4	4	4	4	4	3	4	5
30	0	3	2	2	1	4	3.38	2	5	3	4	2	3	3	5	4	3	5	5	5	5	5	5	5	5	5	5	5	5	5	5	5	5	5	5	5	5	5	5	5	5	5	5	5	5	5	4	5	5
31	0	4	2	2	6	5	3.85	2	4	5	5	5	5	5	1	5	5	1	5	5	5	5	5	5	5	5	1	5	5	5	5	5	5	5	5	5	5	5	5	5	1	1	5	5	5	5	5	5	5
32	0	3	2	2	2	5	5	5	5	5	5	5	5	5	5	5	5	5	5	5	5	5	5	5	5	5	5	5	5	5	5	5	5	5	5	5	5	5	5	5	5	5	5	5	5	5	5	5	5
33	1	3	1	3	4	5	3.69	3	5	3	3	3	3	4	4	4	4	4	4	4	3	3	4	4	4	3	3	4	1	3	3	4	1	4	4	4	4	4	4	4	4	4	2	3	3	3	2	3	2
34	1	2	1	3	1	4	4.62	2	5	5	5	5	5	5	5	5	5	5	5	5	5	5	5	5	5	5	5	5	4	5	5	5	5	4	5	5	5	5	5	5	5	5	5	5	5	5	5	5	5
35	1	3	1	4	1	4	4.15	2	4	5	5	5	5	4	5	4	3	3	4	4	4	4	5	5	4	5	4	5	2	5	5	5	5	4	3	4	4	4	5	5	5	5	5	5	5	5	5	5	3
36	1	2	1	2	2	5	5	5	5	5	5	5	5	5	5	5	5	5	5	5	4	5	5	5	5	5	5	5	5	5	5	5	4	5	5	5	5	5	5	5	5	5	5	5	5	5	5	5	5
37	1	1	8	3	1	5	4.69	5	5	5	5	5	5	5	5	5	5	1	5	5	5	5	5	5	5	5	5	5	4	5	5	5	1	5	5	5	5	5	5	5	4	5	5	5	5	5	5	5	5
38	0	4	2	4	1	3	4.69	4	5	5	5	5	5	5	5	5	5	5	5	4	5	5	5	5	5	5	5	5	4	4	5	5	5	5	5	5	5	5	5	5	5	5	5	5	5	5	5	5	5
39	1	4	1	4	1	5	5	5	5	5	5	5	5	5	5	5	5	5	5	5	5	5	5	5	5	5	5	5	5	5	3	3	3	5	5	5	5	5	5	5	5	5	5	5	5	5	5	5	5
40	1	2	1	2	1	5	3.69	2	5	4	4	4	3	3	4	4	4	3	5	4	3	4	5	4	4	4	4	5	4	4	3	5	4	5	5	5	5	5	5	5	4	5	5	4	4	5	3	5	5
41	1	3	1	3	2	5	4.46	4	5	5	4	4	5	5	5	5	5	5	5	5	5	5	5	5	5	5	5	5	4	5	5	5	5	5	5	5	5	5	5	5	5	5	5	5	5	5	5	5	5
42	1	3	1	3	2	3	4	3	5	5	5	4	4	3	5	5	4	4	4	5	4	4	5	5	5	5	4	4	4	4	5	4	5	4	5	5	5	5	5	5	5	5	5	5	4	5	4	4	5
43	1	4	1	3	2	5	3.92	3	5	5	5	4	4	4	4	3	3	3	3	4	4	4	4	4	4	4	4	5	3	5	5	5	4	5	5	5	5	5	5	5	5	5	5	5	5	5	5	5	4
44	0	3	2	3	1	5	4.85	5	5	5	5	5	4	4	5	5	5	5	5	5	4	4	4	5	4	4	4	5	5	5	5	5	5	5	5	5	5	5	5	5	5	5	5	5	5	5	5	5	5
45	1	3	1	3	1	5	5	5	5	5	5	5	5	5	5	5	5	5	5	5	5	5	5	5	5	5	5	5	3	4	4	5	5	5	5	5	5	5	5	5	5	5	5	5	5	5	5	5	5
46	1	3	1	3	1	5	5	5	5	5	5	5	5	5	5	5	5	5	5	5	5	5	5	5	5	5	5	5	5	5	5	5	5	5	5	5	5	5	5	5	5	5	5	5	5	5	5	5	4
47	1	2	1	2	2	5	4.54	5	5	5	5	5	5	3	5	5	3	3	5	5	5	5	5	5	5	5	5	5	4	5	5	5	5	5	5	5	5	5	5	5	5	5	5	5	5	5	5	5	5
48	1	2	1	2	2	5	5	5	5	5	5	5	5	5	5	5	5	5	5	5	5	5	5	5	5	5	5	5	5	4	5	5	5	5	5	5	5	5	5	5	5	5	5	5	5	5	5	5	4
49	1	2	1	3	2	5	4.85	3	5	5	5	5	5	5	5	5	5	5	5	5	5	5	5	5	5	5	5	5	5	5	5	5	5	5	5	5	5	5	5	5	5	5	5	5	5	5	1	5	5
50	1	4	1	4	2	5	4.54	2	5	5	5	5	4	5	5	5	5	4	5	5	5	5	5	5	5	5	5	5	4	5	5	5	5	5	5	5	5	5	5	5	5	5	5	5	5	5	5	5	4
51	1	3	1	3	1	5	4.38	5	5	5	5	5	3	5	5	3	3	5	5	3	3	3	3	5	5	5	5	5	5	5	5	5	3	5	5	5	5	5	5	5	5	5	5	3	3	5	5	3	3
52	1	2	1	2	4	5	4.69	5	5	5	5	5	5	5	5	3	5	5	5	5	5	5	5	5	5	5	5	5	3	5	5	5	5	5	5	5	5	5	5	5	5	5	5	5	5	5	5	5	5
53	1	3	1	2	5	5	4.62	5	5	5	5	5	5	5	5	5	4	4	5	5	5	5	5	4	5	5	5	5	3	5	5	5	4	5	5	5	5	5	5	5	5	5	3	4	5	5	5	5	4
54	0	3	2	2	2	4	3.77	4	5	4	5	2	4	5	4	4	3	2	5	4	5	5	4	4	4	5	5	5	2	3	5	5	4	5	4	5	5	5	5	4	5	4	4	4	4	4	3	3	4
55	1	3	1	2	4	5	5	5	5	5	5	5	5	5	5	5	5	5	5	5	5	5	5	5	5	5	5	5	1	1	5	5	3	5	5	5	5	5	5	5	5	5	5	5	5	5	5	5	5
56	1	1	1	2	1	5	5	5	5	5	5	5	5	5	5	5	5	5	5	5	5	5	5	5	4	5	5	5	5	5	5	5	5	5	5	5	5	5	5	5	5	5	5	5	3	5	1	1	5
57	1	2	1	2	1	1	3.92	1	1	5	5	5	5	5	5	5	5	5	5	5	5	5	5	5	5	5	5	5	1	2	1	5	5	5	5	5	5	5	5	5	5	5	5	5	5	5	1	5	3
58	0	3	2	4	1	5	4.69	4	5	5	5	5	4	5	5	5	5	4	2	4	3	4	5	4	5	5	5	5	2	5	5	5	2	5	5	5	5	5	5	5	5	5	5	5	5	5	5	5	4
59	0	3	2	4	1	4	4.15	4	5	5	4	5	4	5	3	3	3	5	5	5	4	4	5	5	5	5	5	4	2	5	5	5	3	5	5	5	5	5	4	4	4	4	4	4	4	4	4	4	5
60	1	3	1	3	1	3	4.54	4	5	5	5	5	3	5	5	5	5	5	4	5	5	5	5	5	5	5	5	5	5	5	1	5	5	5	5	5	5	5	5	5	5	5	5	5	5	5	5	5	5
61	1	3	1	2	1	5	4.92	5	5	5	5	5	5	5	5	5	5	4	5	5	5	4	5	5	5	5	4	5	4	5	5	4	5	4	5	5	4	5	5	5	5	5	5	5	5	5	5	5	5
62	1	3	1	3	1	5	4.38	1	5	5	5	5	5	5	5	5	3	3	5	5	5	5	5	5	5	5	5	5	3	5	5	5	4	5	5	5	5	5	5	5	5	5	5	5	5	5	1	5	5
63	0	2	2	3	1	5	4.08	3	3	5	5	5	4	5	5	4	1	5	1	5	4	5	5	5	5	5	4	5	2	3	3	4	2	5	5	5	5	5	4	5	5	5	5	4	1	4	1	4	5
64	1	3	1	2	2	5	4.69	1	5	5	5	5	5	5	5	5	5	5	5	5	5	5	5	5	5	5	5	5	2	5	5	5	5	5	5	5	5	5	5	5	5	5	5	5	5	5	5	5	5
65	1	4	1	2	1	5	4.77	5	5	5	5	5	5	5	5	5	3	4	5	5	5	5	5	5	5	5	5	5	2	5	5	5	5	5	5	5	5	5	5	5	5	5	5	5	5	5	5	5	5
66	1	3	1	2	1	5	4.85	5	5	5	5	5	5	5	5	5	5	5	5	5	5	5	5	5	5	5	5	5	5	5	5	5	5	5	5	5	5	5	5	5	5	5	5	5	5	5	5	5	4
67	1	3	1	3	4	5	4.62	5	5	5	5	5	5	5	5	5	5	1	4	4	5	5	5	5	5	5	5	5	4	5	4	5	4	4	5	5	5	5	5	5	5	5	5	5	5	5	5	5	4
68	1	4	2	5	1	2	4.15	3	5	5	5	5	5	5	5	5	3	4	4	4	4	4	4	4	4	4	4	5	4	4	4	4	5	5	4	4	4	4	5	5	5	5	5	5	5	5	5	5	5
69	0	3	2	2	3	2	2.54	4	3	2	4	1	1	2	5	2	2	3	2	1	1	1	4	3	1	4	4	2	1	2	4	3	2	2	2	3	2	2	3	2	3	3	1	3	4	2	3	2	5
70	1	2	1	2	1	5	4.15	3	4	3	4	3	5	3	5	5	5	4	5	3	5	4	5	5	4	5	3	4	5	5	5	5	4	5	4	4	4	5	4	5	4	4	4	4	4	4	4	4	5
71	1	2	7	4	1	4	3.54	4	4	4	4	4	4	4	4	4	4	1	3	1	1	1	1	1	1	1	1	4	3	4	4	4	2	3	4	4	3	4	4	4	3	3	4	4	4	4	3	3	5
72	1	3	1	2	3	3	4.15	3	4	5	5	5	5	5	5	5	5	1	3	3	3	3	2	1	3	5	5	5	1	5	5	5	2	5	1	5	3	5	5	5	3	3	3	3	4	5	5	5	5
73	0	6	6	2	1	5	4.69	5	5	5	5	5	5	5	5	5	5	1	5	5	5	5	5	5	5	5	5	5	5	5	5	5	5	5	5	5	5	5	5	5	5	5	5	5	5	5	5	5	5
74	1	3	1	4	1	5	4.38	4	4	5	5	5	5	5	5	5	5	1	5	5	5	5	5	5	5	5	5	5	5	5	5	5	5	5	5	5	5	5	5	5	5	5	5	5	5	5	5	5	5
75	1	4	1	3	1	5	4.46	4	3	5	5	5	5	5	5	5	5	3	5	5	5	5	5	5	5	5	5	5	5	5	3	5	3	5	5	5	5	5	5	5	5	3	5	5	5	5	5	5	4
76	1	3	3	3	1	4	3.85	4	3	4	5	5	5	4	3	4	4	1	4	4	4	4	4	3	4	4	5	4	2	3	3	5	5	3	5	5	5	5	5	5	5	5	5	5	5	5	5	5	4
77	0	4	2	3	2	5	4.46	5	5	4	4	4	5	5	5	5	4	2	5	4	5	4	5	5	4	5	5	5	5	4	5	5	5	5	5	5	5	5	5	5	5	5	5	5	5	5	5	5	5
78	0	5	2	3	5	1	2.69	1	3	4	4	4	4	4	4	2	2	1	4	4	4	4	4	4	4	4	4	4	4	4	4	4	4	4	4	4	4	4	4	4	4	4	5	5	5	5	5	5	3
79	1	2	1	3	1	3	3.46	1	3	4	4	4	4	2	5	5	4	3	4	4	4	4	4	4	4	4	4	5	5	5	5	5	4	5	5	5	5	5	4	5	5	5	5	5	5	5	3	5	5
80	1	3	1	2	1	5	5	5	5	5	5	5	5	5	5	5	5	5	5	5	5	5	5	5	5	5	5	5	5	5	5	5	5	5	5	5	5	5	5	5	5	5	5	5	5	5	5	5	5
81	1	7	5	1	1	5	5	5	5	5	5	5	5	5	5	5	5	5	5	5	5	5	5	5	5	5	5	5	5	5	5	5	5	5	5	5	5	5	5	5	5	5	5	5	5	5	5	5	4
82	1	3	1	2	2	5	3.62	2	4	4	4	2	4	3	4	4	4	2	4	4	4	2	3	5	4	3	3	5	5	5	5	5	5	5	5	5	5	5	5	5	5	5	5	5	5	5	5	5	5
83	1	4	1	3	1	2	2	1	5	3	3	1	1	1	3	1	1	1	1	1	1	1	3	3	3	3	3	5	3	3	4	5	3	5	5	5	5	5	5	5	3	5	3	5	5	5	5	5	3
84	1	3	1	4	5	5	4.38	5	5	5	5	3	5	3	5	3	5	3	1	3	5	5	3	3	3	5	5	5	1	5	5	5	3	5	5	5	5	5	5	5	5	5	4	5	4	4	1	4	5
85	1	3	1	3	1	5	3.77	3	4	4	3	4	3	4	5	3	5	2	4	4	5	5	4	4	4	4	4	4	2	4	4	4	4	4	4	4	4	4	5	4	4	4	4	5	5	4	4	4	5
86	1	2	1	2	2	5	4.69	5	3	5	5	5	5	5	5	5	5	4	4	5	5	5	5	5	5	5	5	5	4	5	5	5	5	5	5	5	5	5	5	5	5	5	5	5	5	5	5	5	5
87	1	2	1	1	1	3	2.38	3	3	3	4	3	1	1	4	2	1	1	2	2	2	1	4	4	3	3	4	5	4	4	5	3	4	5	5	5	5	5	5	5	5	4	5	2	4	3	4	4	5
88	1	3	1	1	2	5	3.54	1	5	5	5	3	2	5	5	1	2	2	1	2	5	3	5	3	5	5	5	5	3	5	5	5	5	5	5	5	5	5	5	5	5	5	5	5	5	5	5	5	5
89	1	3	1	2	4	4	2.85	1	2	3	3	3	3	1	4	3	4	2	2	2	3	3	3	3	3	4	4	4	1	5	3	4	3	4	1	3	4	4	4	3	3	4	3	3	3	4	5	5	5
90	1	3	1	2	1	4	4.23	3	5	5	5	5	5	5	5	5	5	1	3	4	4	3	5	5	5	5	5	5	4	5	5	5	5	5	5	5	5	5	5	5	5	5	5	5	4	3	5	5	5
91	1	3	1	2	1	3	2.69	2	2	3	3	3	2	3	4	3	3	1	4	4	3	3	3	3	4	4	4	4	4	5	5	5	4	5	5	5	5	5	5	5	5	5	4	4	4	4	4	4	5
92	1	3	1	3	1	4	3.46	4	4	4	4	3	3	3	3	3	3	3	4	4	4	4	4	4	4	4	4	3	4	3	4	4	4	4	5	5	5	5	5	5	5	5	5	5	5	5	5	5	5
93	1	3	1	5	1	5	4.69	5	5	5	5	5	5	5	5	5	1	5	5	5	5	5	5	5	5	5	5	5	5	5	5	5	5	5	5	5	5	5	5	5	5	5	5	5	5	5	5	5	5
94	1	4	1	3	2	5	4.85	4	5	5	5	5	5	4	5	5	5	5	5	5	5	5	5	5	5	5	5	5	5	5	5	5	5	5	5	5	4	5	5	5	4	5	5	5	5	5	5	5	5
95	1	3	1	3	1	3	4.54	4	5	5	5	5	5	5	5	5	5	5	5	5	5	5	5	5	5	5	5	5	4	1	1	5	3	5	5	5	5	5	5	5	4	5	5	5	4	5	5	4	5
96	1	3	1	3	1	4	4.15	4	3	5	5	4	4	4	4	5	4	5	4	4	4	4	4	4	4	4	5	5	5	5	5	5	5	5	5	5	5	5	5	5	4	5	4	4	4	2	2	3	4
97	0	4	2	4	1	3	4.62	4	5	5	5	5	5	5	5	5	5	5	4	3	4	4	5	5	5	5	5	5	3	1	3	4	5	4	5	5	5	5	5	5	5	5	5	5	5	5	5	5	5
98	0	3	2	3	1	4	4.62	5	5	5	5	5	5	5	4	4	4	4	4	5	5	5	4	5	4	4	5	5	4	4	5	5	4	4	5	4	5	4	5	4	5	4	5	5	5	5	5	5	5
99	1	3	1	6	1	4	4.69	4	5	5	5	4	5	5	5	5	4	5	4	5	5	4	5	5	5	5	5	5	3	2	1	4	3	5	5	4	4	5	5	5	5	5	5	4	4	5	4	5	5
100	1	2	1	2	1	1	4.23	3	5	5	5	5	5	5	5	5	3	5	4	2	5	2	5	5	5	5	5	5	2	1	3	5	5	5	5	4	5	5	5	5	5	5	5	5	5	5	4	5	5
101	1	3	1	6	1	5	5	5	5	5	5	5	5	5	5	5	5	5	5	5	5	5	5	5	5	5	5	5	5	5	4	5	4	5	5	5	5	5	5	5	5	5	5	5	5	5	5	5	5
102	1	3	1	2	2	4	4	1	1	5	5	5	5	5	5	4	3	5	5	5	5	5	5	5	5	5	5	5	5	5	5	5	5	5	5	5	5	5	5	5	5	5	5	5	5	5	5	5	5
103	1	3	1	3	1	5	4.38	4	2	5	5	4	5	5	5	4	4	5	4	4	4	4	5	4	4	5	4	4	3	4	4	4	4	5	4	5	5	5	5	5	5	5	5	5	5	5	5	5	5
104	1	3	1	3	1	5	5	5	5	5	5	5	5	5	5	5	5	5	5	5	5	5	5	5	5	5	5	5	5	5	5	5	5	5	5	5	5	5	5	5	5	5	5	5	5	5	5	5	3
105	1	2	1	2	1	4	4.77	5	5	5	5	5	5	5	5	5	5	5	5	5	5	5	5	5	5	5	5	5	4	5	5	5	5	5	5	5	5	5	5	5	5	5	5	5	5	5	5	5	5
106	1	3	1	2	1	4	4.23	4	4	4	5	5	4	5	5	4	4	3	5	4	4	5	5	4	5	5	5	5	5	3	3	5	4	5	5	4	5	5	5	5	5	5	5	5	5	5	5	5	5
107	1	3	1	4	1	4	3.85	3	5	5	5	5	5	3	3	3	3	3	3	5	5	5	5	5	5	5	5	5	4	5	5	5	5	5	5	5	5	5	5	5	5	5	5	5	5	5	5	5	5
108	1	3	1	2	3	2	2.62	3	2	5	4	4	2	1	2	3	2	2	3	2	2	3	5	5	5	5	5	5	4	5	5	5	2	5	5	5	5	5	5	5	5	5	5	5	5	5	5	5	5
109	0	3	2	2	1	5	3.85	4	4	5	5	3	1	4	4	5	3	4	5	5	3	3	5	5	5	5	5	5	5	5	5	3	5	5	5	5	5	5	5	5	5	5	5	5	3	5	5	5	5
110	0	4	2	3	1	4	3.62	1	5	5	4	5	3	5	5	3	2	1	1	4	4	5	5	5	5	5	5	5	3	4	5	5	3	5	5	5	5	5	5	5	5	5	5	5	5	5	5	5	5
111	1	5	5	1	2	5	5	5	5	5	5	5	5	5	5	5	5	5	5	5	5	5	3	5	5	5	5	5	1	5	5	5	3	5	5	5	5	5	5	5	5	5	5	5	5	5	5	5	5
112	1	3	1	2	3	4	4	5	4	5	5	5	1	5	5	4	3	5	5	5	3	5	5	5	5	5	5	5	5	5	5	5	5	5	5	5	5	5	5	5	5	5	5	5	5	5	5	5	5
113	1	3	1	3	3	5	4.15	2	4	5	5	5	3	5	5	4	5	5	1	5	3	5	5	3	5	5	5	4	1	5	5	5	3	5	5	3	5	5	5	5	5	5	5	5	5	5	5	5	5
114	1	2	1	3	3	1	3.77	1	5	5	5	5	4	5	5	4	4	4	1	5	4	4	4	4	5	4	5	5	1	5	5	5	5	5	5	5	5	5	5	5	5	5	5	5	5	5	5	5	5
115	0	4	3	3	2	5	2.69	1	5	5	3	1	1	5	5	1	1	1	2	1	1	1	4	5	5	5	5	5	5	5	5	5	5	5	5	5	5	5	5	5	5	5	5	5	5	5	5	5	5
116	1	3	1	2	1	4	1.86	1	1	3	1	1	1	3	1	1	1	3.16	1	1	1	1	3	3	3	3	3	5	1	1	3	3	3	4	3	3	3	4	4	4	4	4	5	5	4	5	5	4	5
117	0	3	2	2	2	4	4.08	1	3	4	4	5	5	5	5	3	5	4	2	4	2	3	4	3	3	4	3	4	2	3	4	4	2	4	5	5	4	5	5	5	4	5	5	5	5	5	5	5	5
118	0	4	2	2	2	4	3.03	1	5	5	3	3	3	4	2	2	2	2	4	4	4	4	5	5	5	5	4	4	3	3	3	4	3	4	4	4	4	4	4	3	5	5	4	4	4	5	5	4	2
119	1	3	1	2	4	3	3	1	4	4	4	4	2	4	3	3	3	2	2	5	3	3	4	4	4	4	4	5	2	4	4	4	3	4	4	5	4	5	5	5	5	5	5	5	5	4	4	4	5
120	0	3	2	3	1	2	2.77	2	4	5	4	1	1	5	3	3	2	2	4	4	1	1	3	4	5	5	5	5	3	5	5	5	5	5	5	5	5	5	5	5	5	5	5	5	5	5	5	5	5
121	1	3	1	2	1	5	4.85	5	5	5	5	5	5	5	5	5	5	5	5	5	5	5	5	5	5	5	4	5	4	5	5	5	5	5	5	5	5	5	5	4	5	5	5	5	5	5	5	5	5
122	0	3	2	4	1	4	4.62	5	5	5	5	4	5	5	5	5	5	4	5	5	5	4	5	5	5	5	5	5	5	5	5	5	5	5	5	5	5	5	5	5	5	5	5	5	5	5	5	5	5
123	1	3	1	4	1	4	4.08	2	4	5	5	5	5	5	4	4	5	2	5	5	5	5	5	5	5	5	5	5	4	2	2	5	3	5	5	5	5	5	5	5	3	4	5	5	5	5	5	5	3
124	1	3	1	2	1	5	4.69	5	5	5	5	5	5	5	5	5	5	1	5	5	5	5	5	5	5	5	5	5	5	5	3	5	3	5	5	5	5	5	5	5	5	5	5	5	5	5	5	5	5
125	1	3	1	3	1	5	3.15	3	4	4	3	3	3	2	5	2	2	2	2	2	2	2	2	3	3	3	3	4	3	2	5	5	3	3	4	4	3	2	3	3	3	3	3	3	3	3	3	4	5
126	1	7	1	2	2	5	5	5	5	5	5	5	5	5	5	5	5	5	5	5	5	5	5	5	5	5	5	5	5	5	5	5	5	5	5	5	5	5	5	5	5	5	5	5	5	5	5	5	4
127	2	7	9	7	7	5	5	5	5	5	5	5	5	5	5	5	5	3	5	5	5	5	5	5	4	5	5	5	5	5	5	5	5	5	5	5	5	5	5	5	5	5	5	5	5	5	5	5	2
128	1	2	9	3	7	3	3.97	1	5	5	5	5	5	5	5	5	3	2	4	4	4	4	5	5	5	5	5	5	2	2	4	4	4	5	5	5	5	5	5	5	4	5	5	5	5	1	1	5	5
129	1	3	1	5	7	3	2	2	5	5	5	5	5	5	5	4	4.55	2	4	4	4	4	4	4	4	4	4	4	2	2	2	4	4	4	4	4	4	4	4	4	4	4	4	4	4	4	2	4	5
130	1	3	1	2	7	4	5	4	5	5	4	5	5	4.86	4	4.63	4	3	4	4	5	4	5	4	5	5	4	5	4	5	5	5	4	5	5	5	5	5	4	5	5	5	5	4	3	5	5	5	3
131	1	3	1	4	2	5	5	5	5	5	5	5	5	5	5	5	5	1	5	5	5	5	5	5	5	5	5	5	1	5	5	5	1	5	5	5	5	5	5	5	5	5	5	5	5	5	5	5	5
132	2	7	9	7	7	5	3	1	5	5	5	5	5	4	5	4.59	4	1	5	5	5	5	5	5	5	3	5	3	4	5	5	5	3	5	5	4	5	5	5	3	4	5	5	5	5	5	4	5	5
133	1	4	1	3	1	2	5	5	5	5	5	5	5	5	5	5	5	1	5	5	5	5	5	5	5	5	5	5	1	5	5	5	5	5	5	5	5	5	5	5	5	5	5	5	5	5	1	5	5
134	0	4	2	4	3	4	4	3	5	5	5	5	5	5	5	5	5	2	5	5	5	5	5	5	5	5	5	5	3	5	5	5	4	5	5	5	5	5	4	4	4	4	5	5	5	4	5	5	4
135	1	3	2	4	1	4	5	5	5	5	5	5	5	5	5	4	5	1	5	5	5	5	5	5	5	5	5	5	5	5	5	4	5	5	5	5	5	5	5	5	5	5	5	5	5	4	5	5	5
136	1	2	1	3	1	5	3	3	3	5	5	5	5	5	5	5	5	1	4	5	5	5	5	5	5	5	5	5	5	5	5	5	4	3	5	5	5	5	5	5	5	1	5	5	5	5	5	5	5
137	0	2	2	3	2	5	3	1	5	5	5	5	5	5	5	4	2	1	5	5	3	4	5	5	5	5	5	5	5	5	2	1	2	5	5	5	5	3	5	5	1	5	5	5	5	5	5	5	5
138	1	7	1	2	7	5	5	5	5	5	5	5	5	5	5	5	5	2	5	5	5	5	5	5	5	5	5	5	3	1	3	5	5	5	5	5	5	5	5	5	5	5	5	5	5	3	3	1	5
139	1	2	4	3	1	5	4.08	4	4	5	5	4	4	5	5	5	4	5	5	5	4	4	5	5	5	5	5	5	4	4	5	5	5	5	5	5	5	5	5	4	5	5	4	5	4	5	5	5	5
140	1	3	1	3	4	5	5	3	4.8	4	3	3	4	4	5	3	3	3	4	4	3	3	4	4	4	4	4	4	2	3	4	4	5	4	4	5	5	5	5	5	5	5	4	4	4	3	2	4	5
141	2	7	9	7	7	3	3	3	4	5	5	5	5	4	5	5	4	4	4	4	5	5	4	4	4	4	5	3	2	3	3	5	1	5	5	4	4	5	4	5	4	4	4	5	4	5	5	4	4
142	0	3	2	4	3	5	5	5	5	5	5	5	5	5	5	5	5	5	5	5	5	5	5	5	5	5	5	5	5	5	5	5	5	5	5	5	5	5	5	5	5	5	5	5	5	5	5	5	5
143	0	4	2	4	1	3	4	5	5	5	4	4	5	5	5	5	4	4	4	4	4	5	4	5	5	5	5	5	3	4	3	5	4	5	5	5	5	5	5	5	5	5	5	4	5	5	3	4	5
144	0	4	2	2	4	5	5	5	4.8	5	5	5	5	5	5	5	3	4	5	5	5	5	5	5	5	5	5	5	5	5	5	5	5	5	5	5	5	5	5	5	5	5	5	5	5	5	5	5	5
145	2	7	9	7	7	3	3	3	4.8	5	4	4	4	4	4	4	4	5	5	5	4	4	4	5	5	5	5	5	5	5	5	5	5	5	5	5	5	5	5	5	5	5	5	5	5	5	5	5	5
146	1	7	1	3	3	5	3	5	5	5	5	4	4	5	5	4.44	3	3	4	3	4	3	5	5	5	5	5	5	4	4	5	5	4	5	5	5	5	5	5	5	5	5	4	5	5	5	5	4	5
147	0	3	2	4	4	5	3	4	5	5	5	4	4	5	5	4	4	3	4	5	5	4	4	4	5	5	4	4	5	5	5	5	4	5	4	4	4	4	5	5	5	5	4	4	4	3	3	4	5
148	0	2	2	3	1	5	4.15	5	5	5	5	5	5	5	5	5	5	5	4	5	5	5	5	5	5	5	5	5	5	5	5	5	5	5	5	5	5	5	5	5	5	5	5	5	5	5	5	5	5
149	0	4	2	3	1	5	3	3	5	5	4	5	4	4	4	4	3	4	5	4	4	4	4	4	5	5	5	5	5	3	5	5	5	5	5	5	5	5	5	5	5	5	5	5	5	5	5	5	5
150	1	3	1	2	1	5	5	5	5	5	5	5	5	5	5	5	4	5	5	5	5	5	5	5	5	5	5	5	5	5	5	5	5	5	5	5	5	5	5	5	5	5	5	5	5	5	5	5	5
151	1	3	1	4	1	5	5	5	5	5	5	5	5	5	5	3	3	5	5	5	5	5	5	5	5	5	5	5	3	4	5	5	5	5	5	5	5	5	5	5	5	5	5	5	5	5	5	5	5
152	2	7	1	7	7	3	3	3	5	4	4	4	4	5	5	5	1	3	3	4	4	5	5	5	5	5	5	4	3	5	5	5	1	5	3	3	3	5	5	3	4	3	2	4	4	5	1	1	5
153	1	3	1	3	4	3	1	2	5	4	4	3	3	3	3	2	2	1	2	2	2	2	3	3	3	2	2	2	1	1	2	3	1	3	3	3	3	3	2	2	1	1	2	1	1	1	2	2	5
154	1	3	1	4	1	4	4	4	4	4	4	4	4	4	4	4	3	4	4	4	4	4	4	4	4	4	4	5	4	5	5	5	5	5	5	5	5	5	5	5	5	5	5	5	5	5	5	5	5
155	1	3	1	3	2	5	4.31	5	5	5	5	5	3	5	5	5	2	1	5	5	3	3	5	5	5	5	5	5	5	5	5	5	5	5	3	5	5	5	4	5	5	5	5	5	5	5	5	5	5
156	1	3	1	3	1	4	3.08	4	4	5	5	2	1	5	5	2	1	1	4	2	1	5	4	3	2	5	5	5	5	5	2	2	2	5	5	5	5	5	5	5	5	5	5	5	4	1	5	5	5
157	1	3	1	4	2	3	3.62	3	3	4	4	4	4	4	4	5	2	4	4	4	4	4	4	4	4	4	4	3	3	1	4	4	3	5	4	4	4	4	3	4	3	4	4	4	4	4	4	4	5
158	1	2	1	2	2	5	4.85	5	3	5	5	5	5	5	5	5	5	5	5	5	5	5	5	5	5	5	5	5	3	5	3	5	5	5	5	5	5	5	5	5	5	5	5	3	5	5	5	5	4
159	1	3	1	3	1	2	4	5	5	5	5	5	3	5	5	5	5	1	3	5	5	5	5	5	5	5	5	5	5	5	5	5	5	5	5	5	5	5	5	5	5	5	5	5	5	5	3	5	5
160	1	2	1	3	1	5	5	5	5	5	5	5	5	5	5	5	5	5	5	5	5	5	5	5	5	5	5	5	3	5	5	5	5	5	5	5	5	5	5	5	5	5	5	5	5	5	5	5	4
161	1	2	1	2	1	5	4.85	3	5	5	5	5	5	5	5	5	5	5	5	5	5	5	5	5	5	5	5	5	1	5	5	5	3	5	5	5	5	5	5	5	5	5	5	5	5	5	5	5	5
162	1	3	3	3	2	4	4.54	4	5	5	5	5	5	5	4	4	4	4	5	5	5	5	5	5	5	5	5	5	3	4	5	5	4	5	5	5	5	5	5	5	5	5	5	5	5	5	5	5	5
163	1	3	1	4	3	3	4.62	5	5	5	5	5	5	5	5	5	4	5	5	4	5	5	5	5	5	5	5	5	3	5	5	5	5	5	5	5	5	5	5	5	5	5	5	5	5	5	5	5	5
164	1	4	1	4	1	5	3.77	5	1	5	4	2	2	3	5	5	5	2	3	4	3	3	4	3	3	5	3	4	1	1	2	5	1	5	5	3	3	5	5	3	2	4	5	5	5	4	4	2	5
165	1	4	1	2	1	3	4.85	5	5	5	5	5	5	5	5	5	5	5	5	5	5	5	5	5	5	5	5	5	5	5	1	5	5	5	5	5	5	5	5	5	5	5	5	5	5	5	5	5	5
166	1	3	1	2	2	4	4.38	4	4	5	5	5	5	4	5	5	4	4	5	5	5	5	5	5	5	5	5	5	4	3	4	5	4	5	5	5	5	5	5	5	5	5	4	5	5	5	5	5	4
167	0	3	2	3	1	5	4.85	5	5	5	5	5	4	5	5	5	5	4	5	5	5	5	5	4	5	5	1	5	1	4	4	5	4	5	5	5	5	5	5	5	5	5	5	4	4	4	5	4	5
168	0	4	2	4	1	3	3.54	2	2	4	5	3	4	4	5	4	4	4	2	3	4	5	5	5	5	5	5	5	5	4	5	5	4	5	5	5	5	5	5	5	5	5	5	5	5	5	5	5	5
169	1	3	1	2	2	5	4.46	5	5	5	5	5	5	5	4	5	5	3	5	5	5	5	5	5	5	5	5	5	3	5	5	5	5	5	5	5	5	5	5	5	5	5	5	5	5	1	5	5	5
170	0	3	2	3	1	3	2.77	1	4	4	4	4	1	2	3	3	4	2	3	3	4	3	4	4	4	4	3	1	1	2	2	2	3	1	3	3	4	4	4	3	3	4	3	3	3	3	2	3	5
171	1	3	1	4	2	5	4.54	5	4	5	5	5	4	5	5	5	3	3	3	4	5	5	5	5	5	5	5	5	3	5	5	5	5	5	5	5	5	5	5	5	5	5	5	5	5	5	5	5	5
172	1	3	1	3	2	2	3.15	2	4	4	5	4	4	4	4	3	3	1	3	4	4	4	5	5	4	4	4	4	4	4	5	5	4	5	5	5	5	5	5	5	5	5	5	5	5	5	5	5	5
173	1	3	1	3	3	5	3.08	1	2	2	3	4	2	5	5	2	5	1	1	1	1	5	2	1	2	4	3	2	4	2	1	5	3	4	4	4	4	4	3	1	4	2	2	4	3	4	4	4	5
174	1	3	1	2	1	5	4	3	5	5	5	5	5	5	5	3	3	1	5	5	5	5	5	5	5	5	5	5	5	5	5	5	5	5	5	5	5	5	5	5	5	5	5	5	5	5	5	5	5
175	0	3	2	4	1	4	3.62	2	5	5	5	4	2	2	5	5	5	2	2	2	2	3	4	4	4	5	5	5	5	4	5	5	3	5	5	5	5	5	5	5	3	5	4	5	5	5	5	5	5
176	1	3	1	3	1	5	4.15	5	1	5	5	5	5	5	5	5	4	1	5	5	5	5	5	5	5	5	5	5	5	5	3	5	3	5	5	5	5	5	5	5	5	5	5	5	5	5	5	5	5
177	1	4	1	2	2	4	4	4	2	5	4	5	4	5	5	5	5	1	3	3	3	3	4	3	4	4	4	5	5	5	1	5	3	5	5	5	5	5	5	5	4	3	5	5	5	5	1	5	5
178	0	3	2	2	1	3	3	1	3	4	4	5	4	4	5	2	2	1	1	1	2	3	3	4	3	3	3	5	1	4	4	4	3	4	5	4	4	3	4	3	4	5	4	4	4	4	3	3	5
179	1	3	1	2	2	5	4.69	5	5	5	5	5	5	5	5	5	5	1	1	4	5	5	5	5	5	5	5	5	5	5	5	5	5	5	5	5	5	5	5	5	5	5	5	5	5	5	5	5	5
180	1	2	1	2	1	5	3.85	2	3	5	5	5	5	5	5	3	5	1	4	5	5	5	5	5	5	5	5	5	5	5	3	5	3	3	5	5	5	5	5	5	4	5	5	5	5	5	5	5	5
181	1	3	1	2	2	5	4.23	3	3	5	5	5	3	3	5	4	5	4	4	4	4	4	4	3	4	5	4	4	2	5	5	5	3	5	5	5	5	5	5	5	5	1	2	5	5	5	5	5	5
182	1	3	1	4	2	4	3.69	4	4	4	4	4	4	4	4	3	4	3	3	3	4	4	4	4	4	4	4	5	1	5	5	5	3	5	5	5	5	5	5	5	4	5	5	5	5	5	3	4	5
183	1	3	1	4	1	4	3.69	4	4	4	4	4	3	4	4	3	4	4	4	4	4	4	4	4	4	4	4	5	5	5	5	5	5	5	5	5	5	5	5	5	5	5	5	5	5	5	5	5	5
184	0	4	2	4	2	4	3.85	4	4	4	3	4	4	4	4	4	3	4	4	4	4	4	4	4	4	4	4	5	4	4	4	5	4	4	5	5	5	5	4	4	4	4	4	4	5	4	4	5	4
185	1	3	1	4	1	4	3.46	4	3	4	5	5	4	3	2	2	2	3	3	3	3	4	4	4	4	4	4	4	2	5	5	5	4	3	4	4	4	4	4	4	4	4	4	4	4	4	4	4	5
186	1	3	1	2	1	5	4.23	4	5	4	5	5	5	4	4	5	3	4	4	4	5	5	5	5	4	5	5	5	3	2	5	5	5	5	5	5	5	5	5	5	5	5	5	5	5	5	5	5	5
187	1	3	1	4	1	4	2.69	2	3	2	3	3	3	3	2	2	2	2	2	2	3	3	2	2	2	3	3	4	2	4	4	4	3	3	5	5	5	5	5	5	5	5	5	5	4	5	4	4	5
188	1	3	1	3	1	3	3.62	2	5	4	3	3	2	5	5	3	5	4	2	3	4	4	5	5	5	5	4	5	3	4	4	5	4	4	5	5	5	5	5	5	5	5	5	5	5	5	5	5	5
189	1	3	1	4	2	4	4.46	1	5	5	5	5	5	5	5	5	5	5	5	5	5	5	5	5	5	5	5	5	5	5	5	5	5	5	5	5	5	5	5	5	5	5	5	5	5	5	5	5	5
190	0	4	2	3	3	2	3.54	1	5	5	5	5	2	4	5	4	4	3	4	4	4	4	5	4	4	5	4	5	3	3	3	3	4	3	5	5	4	5	5	5	4	3	5	5	5	5	5	5	5
191	1	2	1	3	1	5	4.54	3	5	5	5	4	5	3	5	5	5	5	4	5	5	3	5	5	5	5	5	5	5	4	5	5	3	5	5	5	5	5	5	5	5	5	5	5	5	5	5	5	5
192	1	3	1	2	3	5	4.54	5	5	5	5	5	3	5	5	5	5	3	5	5	5	5	5	5	5	5	5	5	1	1	3	5	1	5	5	5	5	5	5	5	5	5	5	5	5	5	5	5	5
193	1	2	1	3	1	5	4.62	3	5	5	5	5	5	5	5	4	4	4	5	5	5	5	5	5	5	5	5	5	4	4	5	5	5	5	5	5	5	5	5	5	5	5	5	5	5	5	5	5	5
194	1	2	1	1	3	5	4.38	5	1	5	5	5	5	5	5	5	5	1	5	5	5	5	5	5	5	5	5	5	3	5	2	5	5	5	5	5	5	5	5	5	5	5	5	5	5	5	5	5	5
195	1	3	1	3	1	5	3.69	2	5	4	4	4	4	5	4	3	2	1	4	4	4	3	4	5	4	4	4	4	4	4	3	4	3	3	4	5	5	5	5	5	4	4	4	4	4	5	5	4	5
196	1	5	5	4	1	4	4.08	3	1	5	5	5	5	5	5	5	5	1	5	5	5	5	5	5	5	5	5	4	4	1	1	5	5	5	5	5	5	5	5	5	5	5	5	5	5	5	5	5	5
197	1	3	1	4	1	5	4.15	2	5	5	5	5	5	4	5	5	4	1	3	3	3	3	4	4	4	4	5	4	2	2	1	5	1	3	5	5	4	5	5	4	5	4	3	3	3	1	5	5	5
198	1	2	1	2	1	1	3.77	2	5	5	5	5	4	5	5	5	4	1	5	4	5	5	5	5	5	5	5	4	1	3	3	5	3	5	4	4	5	5	5	4	5	5	5	5	5	5	3	5	5
199	0	2	2	1	4	5	4.62	5	4	5	5	4	4	4	5	5	5	4	5	4	4	4	5	4	4	5	5	5	2	4	4	5	5	5	5	5	5	5	5	5	5	5	5	5	4	4	5	5	5
200	1	3	1	2	1	3	3.53	5	5	5	5	1	3	3	5	3	3.96	1	3	4	3	3	3	3	3	4	4	5	1	3	5	5	3	5	5	5	5	5	5	3	3	4	5	5	5	5	3	4	5
201	1	4	1	2	1	4	3.6	2	4	4	5	4	4.13	3	5	4	3	1	4	4	4	4	5	5	4	4	5	5	5	5	5	5	5	5	5	5	5	5	5	5	5	5	5	5	5	5	5	5	5
202	1	3	1	3	2	2	2	2	1	3	3	1	2	2	2	2	3	1	1	2	2	1	2	3	2	3	3	3	2	5	5	5	4	5	3	4	4	4	4	3	3	4	3	5	4	5	4	5	4
203	1	3	1	4	1	4	3.23	2	1	3	4	3	2	2	5	4	4	3	3	3	3	3	3	3	3	4	3	5	5	5	5	5	5	5	5	5	5	5	5	5	5	5	4	4	4	5	5	5	5
204	0	3	2	4	4	4	4.85	4	5	5	5	5	5	5	5	5	5	5	5	5	5	5	5	5	5	5	5	5	5	5	5	5	5	5	5	5	5	5	5	5	5	5	5	5	5	5	5	5	4
205	0	4	2	3	1	5	4.46	4	5	5	5	5	5	3	5	5	5	3	3	3	3	3	5	5	5	5	5	5	5	5	5	5	5	5	5	5	5	5	5	5	5	5	5	5	5	4	5	5	5
206	0	3	2	2	1	5	4.15	1	5	5	5	5	5	5	5	4	3	1	5	5	5	5	4	4	5	5	5	5	4	5	5	5	5	5	5	5	5	5	5	4	5	5	5	5	5	5	5	5	5
207	1	2	1	2	1	5	4.85	5	5	5	5	5	5	5	5	5	5	5	5	5	5	5	5	4	5	5	5	5	3	5	5	5	5	5	5	5	5	5	5	5	5	5	5	5	5	5	5	5	4
208	1	3	1	2	4	5	3.69	3	3	5	4	4	3	3	5	3	3	4	5	4	4	4	5	5	5	4	4	5	4	5	5	5	4	5	5	5	5	5	5	4	5	5	5	5	5	5	5	5	5
209	1	3	1	4	1	2	2.69	1	2	5	4	4	4	4	3	2	1	2	3	3	3	3	5	3	4	5	5	5	5	5	5	5	3	5	5	5	5	5	5	5	5	5	5	5	5	5	5	5	5
210	1	4	1	3	2	3	3.15	1	5	5	5	5	1	5	2	2	1	1	5	5	1	5	5	5	5	5	5	5	4	5	5	5	5	5	5	5	5	5	5	5	5	5	5	5	5	5	5	5	4
211	0	4	2	2	2	5	3.85	1	5	5	5	5	5	5	5	2	4	2	5	5	5	5	5	5	5	5	5	5	5	5	5	5	5	5	4	5	5	5	5	5	5	4	5	5	5	5	5	5	5
212	1	3	1	2	4	3	3.46	3	4	5	3	3	2	5	5	3	3	3	4	3	3	5	5	5	5	5	5	4	4	4	4	4	4	4	4	5	5	5	5	5	5	5	5	5	4	4	4	4	5
213	0	3	2	3	1	5	3.62	1	3	5	5	5	5	5	5	5	1	1	5	5	3	5	5	5	5	5	5	5	5	5	5	5	5	1	5	5	5	5	5	5	3	5	5	3	5	5	5	5	4
214	1	3	1	3	1	5	5	4	5	5	5	4	4	5	5	4	5	3	5	5	5	4	5	5	5	5	5	5	5	5	5	5	5	5	5	5	5	5	5	5	5	5	5	5	5	5	5	5	4
215	1	3	1	3	1	5	5	3	4.79	5	5	5	4	5	5	5	4.63	3	5	5	5	5	5	5	5	5	4	4	3	4	4	4	4	4	4	4	4	5	4	4	4	4	4	4	4	5	5	4	5
216	1	5	5	3	1	5	5	5	5	5	5	5	5	5	5	5	5	1	5	5	5	5	5	5	5	5	5	5	5	5	5	5	4	5	5	5	5	5	5	5	5	5	5	4	5	4	5	5	5
217	1	2	1	3	1	5	4	5	5	4	5	5	5	5	5	5	4	4	4	4	5	5	5	5	5	5	5	5	4	5	5	5	5	5	5	5	5	5	5	5	5	5	5	5	5	4	5	5	5
218	1	3	1	2	7	5	5	5	5	5	5	5	1	5	5	3	3	1	5	5	1	5	5	5	5	5	5	5	2	5	5	5	5	5	5	5	5	5	5	5	5	5	5	5	5	5	5	5	4
219	1	3	1	3	7	5	5	5	5	5	5	5	2	5	5	4	5	1	5	5	2	5	5	5	5	5	5	5	1	1	5	5	5	5	5	5	5	5	5	5	5	5	5	5	5	5	5	5	5
220	0	3	2	3	3	2	2	2	5	5	5	5	5	5	5	5	5	3	3	5	5	5	5	5	5	5	5	5	5	5	5	5	5	5	5	5	5	5	5	5	5	5	5	5	5	5	5	5	5
221	0	2	1	2	1	4	5	3	5	5	5	5	5	5	5	5	5	5	5	5	5	5	5	5	5	5	5	5	5	3	5	5	5	5	5	5	5	5	5	5	5	5	5	5	5	5	5	5	4
222	1	1	4	3	1	5	4	4	5	5	5	4	5	5	5	5	4	3	4	5	5	5	5	5	5	5	5	4	4	3	3	5	3	5	5	5	4	4	5	5	5	4	4	5	4	3	3	3	5
223	1	2	1	4	3	4	5	5	5	5	5	5	5	5	5	5	5	1	5	5	5	5	5	5	5	5	5	5	5	5	5	4	5	5	5	5	5	5	5	5	5	5	5	4	5	5	5	5	5
224	0	4	2	7	3	5	5	5	5	5	5	5	5	5	5	5	5	1	5	5	5	5	5	5	5	5	5	5	5	5	5	5	5	5	5	5	5	5	5	5	5	5	5	5	5	5	5	5	5
225	1	3	1	3	1	5	5	5	5	5	5	5	5	5	5	5	5	1	5	5	5	5	5	5	5	5	5	5	5	5	5	5	5	5	5	5	5	5	5	5	5	5	5	5	5	5	1	5	5
226	1	4	1	3	2	3	4	3	4	4	4	4	2	4	4	4	2	2	4	4	2	2	4	4	4	4	4	4	3	4	4	4	4	3	4	4	4	4	4	4	4	4	5	5	5	5	5	5	5
227	1	3	1	3	2	5	4	4	3	3	4	3	3	4	4	3	4	3	4	5	4	4	5	5	5	5	5	5	4	3	5	3	3	5	5	5	5	5	5	5	5	5	4	5	5	5	3	4	5
228	1	7	3	7	7	5	5	4	5	5	5	4	2	5	3	3	1	3	4	4	3	3	5	5	5	5	5	5	4	5	5	5	4	5	5	5	5	5	5	5	5	5	5	5	5	4	5	5	5
229	1	3	1	3	1	5	5	5	5	5	5	5	5	5	5	5	5	5	5	4	5	5	5	5	5	5	5	5	4	3	5	5	4	5	5	5	5	5	5	5	5	5	5	5	5	5	5	5	5
230	2	7	1	7	7	4	4	4	4	4	4	4	4	4	5	5	3	2	3	3	3	3	4	4	4	4	5	4	4	2	2	5	4	4	4	4	4	4	4	4	4	4	3	3	3	3	4	4	5
231	2	7	2	7	7	3	3	3	3	3	3	3	3	4.62	5	3	3	5	4	5	3	4	5	3	4	3	5	5	4	5	5	5	5	5	5	5	5	5	5	5	5	5	5	5	5	5	5	5	5
232	0	2	2	2	1	1	2	2	1	1	1	1	1	1	1	1	1	1	2	1	1	1	1	1	1	1	1	1	1	1	1	1	4	5	1	1	1	1	1	1	1	1	1	1	1	1	1	1	5
233	2	3	1	4	7	5	5	5	4	4	5	5	5	4	5	4.33	4	5	5	5	5	5	5	4	5	5	5	5	5	4	5	5	4	5	5	5	5	5	5	5	5	5	5	4	5	5	5	5	4
[truncated: 6 more columns]
